# Supplementary material
Source: publisher figshare collection journal article supplement (https://aacr.figshare.com/articles/dataset/_/22432518)
Supplement: Supplementary file 1 [file 39878907]

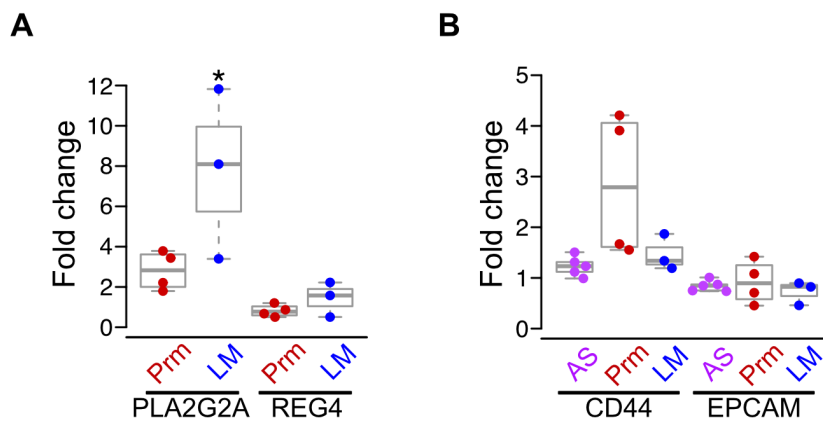

**Supplementary Figure S5. Expression of intestinal stem-cell-related markers in primary tumors and liver metastases of CKPS mice.** (A) Protein levels of PLA2G2A and REG4 in primary intestinal tumors (Prm) and liver metastases (LM) of CKPS mice, based on proteomic analysis. Proteomic analysis failed to detect these proteins in intestinal adenocarcinomas of *cis-Apc/Smad4* mice. (B) Protein levels of CD44 and EPCAM, known markers of CRC stem cells, in intestinal adenocarcinomas of *cis-Apc/Smad4* mice (AS), primary tumors (Prm), and liver metastases (LM) of CKPS mice, based on proteomic analysis. Values represent changes compared with normal intestinal tissues. Data are presented as beeswarm and box plots and assessed with one-way ANOVA and Tukey HSD test. \* $p < 0.05$  vs normal intestinal tissue in (A).
